# Supplementary material for: Serum Uric Acid Is a Mediator of the Association Between Obesity and Incident Nonalcoholic Fatty Liver Disease: A Prospective Cohort Study
Source: PubMed Central journal article supplement (PMC8158156; doi:10.3389/fendo.2021.657856), 2021-05-13
Supplement: Image_1.pdf [file Image_1.pdf]

Supplemental Figure 1. The changes of serum parameters and BMI during follow up period.

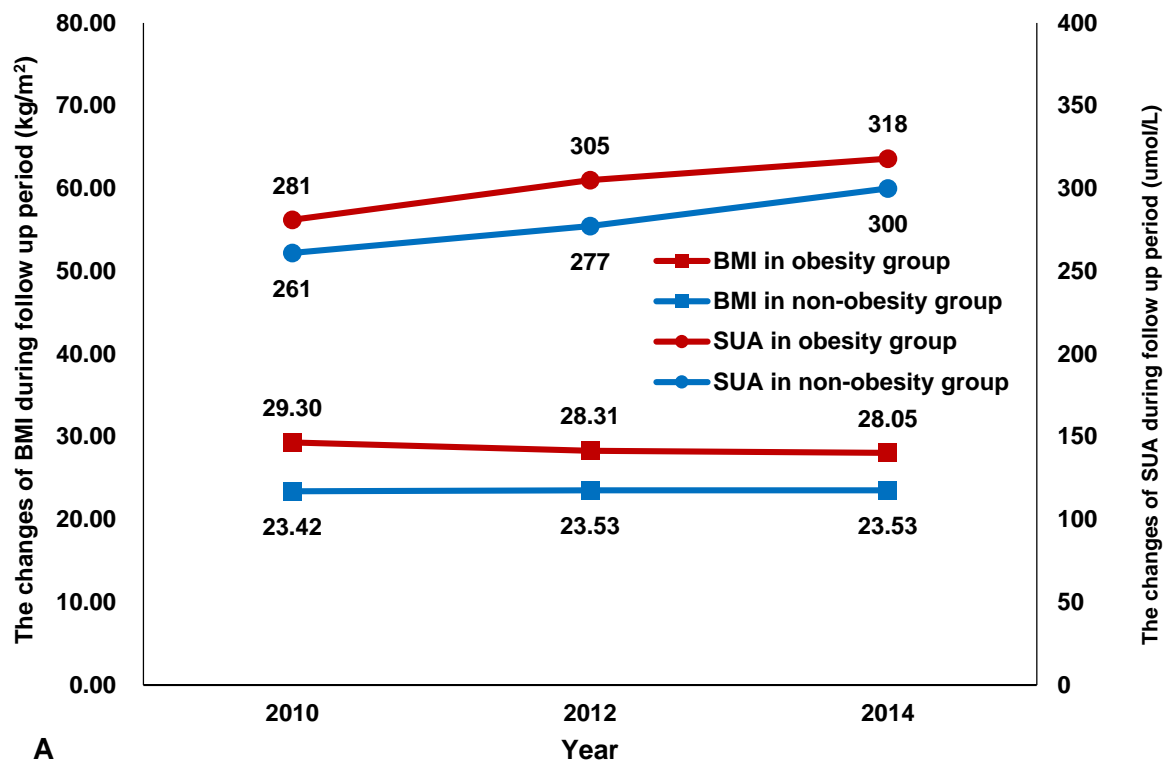

A

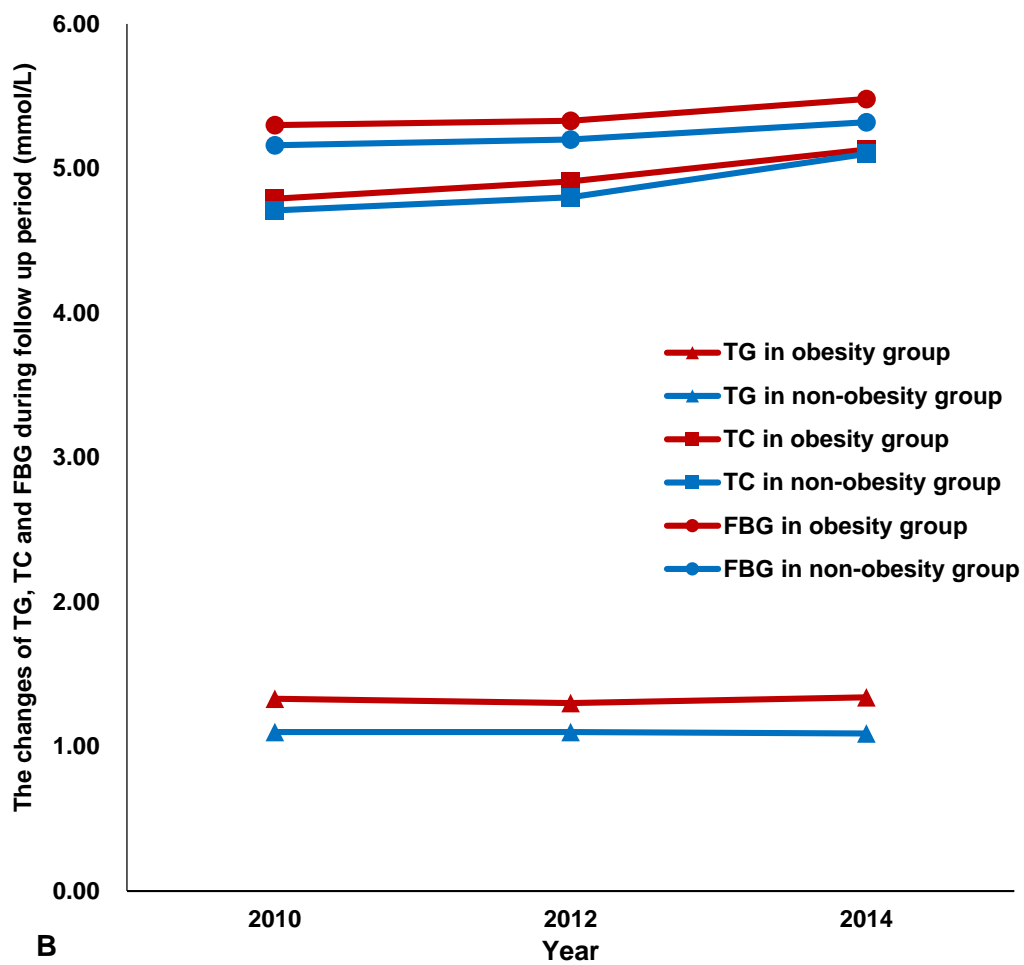

B
